# Supplementary material for: SARS-CoV-2 Uses CD4 to Infect T Helper Lymphocytes
Source: bioRxiv or medRxiv preprint supplement (doi:10.1101/2020.09.25.20200329), 2023-01-11
Supplement: Supplementary file [file media-1.pdf]

**Supplementary Table 1**

| Subject                  | Gender          | Age range (y)<br>Mean (SD) | Admittance O2<br>saturation (%)<br>Mean (SD) |
|--------------------------|-----------------|----------------------------|----------------------------------------------|
| <b>Healthy Donors</b>    |                 |                            |                                              |
| H19 20 000001            | M               | 26-30                      | -                                            |
| H19 20 000002            | M               | 41-45                      | -                                            |
| H19 20 000003            | M               | 46-50                      | -                                            |
| H19 20 000004            | F               | 51-55                      | -                                            |
| H19 20 000005            | M               | 41-45                      | -                                            |
| H19 20 000006            | F               | 36-40                      | -                                            |
| H19 20 000007            | M               | 31-35                      | -                                            |
| H19 20 000008            | F               | 26-30                      | -                                            |
| H19 20 000009            | M               | 46-50                      | -                                            |
|                          | <b>M/F: 6:3</b> | <b>36.4 (9.60)</b>         |                                              |
| <b>COVID-19 Patients</b> |                 |                            |                                              |
| C19 20 000001            | F               | 36-40                      | 86 ra                                        |
| C19 20 000002            | F               | 41-45                      | 91 ra                                        |
| C19 20 000003            | M               | 36-40                      | 100 nrb                                      |
| C19 20 000004            | M               | 61-65                      | 92 ra                                        |
| C19 20 000005            | F               | 41-45                      | 89 ra                                        |
| C19 20 000006            | F               | 76-80                      | 90 ra                                        |
| C19 20 000007            | F               | 56-60                      | 92 ra                                        |
| C19 20 000008            | F               | 56-60                      | 92 ra                                        |
| C19 20 000009            | F               | 56-60                      | 94 ra                                        |
| C19 20 000010            | F               | 36-40                      | 90 ra                                        |
| C19 20 000011            | M               | 41-45                      | 87 ra                                        |
| C19 20 000012            | M               | 76-80                      | 86 ra                                        |
| C19 20 000013            | F               | 41-45                      | 98 ra                                        |
| C19 20 000014            | M               | 31-35                      | 92 ra                                        |
| C19 20 000015            | M               | 36-40                      | 93 ra                                        |
| C19 20 000016            | M               | 66-70                      | 87 ra                                        |
|                          | <b>M/F: 7:9</b> | <b>50.9 (15)</b>           | <b>91.2 (3.9)</b>                            |

\*Patients IDs are not identifying in the manuscript.
