# Supplementary material for: SARS-CoV-2 Uses CD4 to Infect T Helper Lymphocytes
Source: bioRxiv or medRxiv preprint supplement (doi:10.1101/2020.09.25.20200329), 2023-01-11
Supplement: Supplementary file [file media-3.pdf]

**Supplementary Table 3**

| <b>Antibody</b>                                                | <b>Fluorochrome</b> | <b>Clone</b>                                                                   | <b>Manufacture Catalogue</b>                |
|----------------------------------------------------------------|---------------------|--------------------------------------------------------------------------------|---------------------------------------------|
| Anti-CD4 (Human) Monoclonal                                    | FITC                | RPA-T4                                                                         | BD Biosciences Cat.: 555346                 |
| Anti-CD4 (Human) Monoclonal                                    | APC                 | SK3                                                                            | BD Biosciences Cat.: 566915                 |
| Anti-CD4 (Human) Monoclonal                                    | BUV661              | SK3                                                                            | BD Biosciences Cat.: 612962                 |
| Anti-CD3 (Human) Monoclonal                                    | PercP-Cy5.5         | SP34-2                                                                         | BD Biosciences Cat.: 552852                 |
| Anti-CD3 (Human) Monoclonal                                    | BV480               | UCHT1                                                                          | BD Biosciences Cat.: 51-9015420             |
| Anti-CD8a (Human) Monoclonal                                   | PE-Cy7              | RPA-T8                                                                         | eBioscience (ThermoFisher) Cat.: 25-0088-42 |
| Lineage Cocktail 1 (Human)- CD3, CD14, CD16, CD19, CD20, CD56) | FITC                | SK7 (CD3), MFP9 (CD14), 3G8 (CD16), SJ25C1 (CD19), L27 (CD20), NCAM16.2 (CD56) | BD Biosciences Cat.: 552852                 |
| Zombie Aqua™ Fixable Viability Kit                             | BUV496              | -                                                                              | BioLegend Cat.: 423101                      |
| Anti-CD14 (Human) Monoclonal                                   | BUV805              | M5E2                                                                           | BD Biosciences Cat.: 612902                 |
| Anti-CD16 (Human) Monoclonal                                   | BUV496              | 3G8                                                                            | BD Biosciences Cat.: 612944                 |
| Anti-CD19 (Human) Monoclonal                                   | BUV563              | SJ25C1                                                                         | BD Biosciences Cat.: 51-9016630             |
| Anti-CD45 (Human) Monoclonal                                   | APC-Cy7             | 2D1                                                                            | BD Biosciences Cat.: 557833                 |
| Anti-CD123 (Human) Monoclonal                                  | PE-Cy5              | 9F5                                                                            | BD Biosciences Cat.: 51-9015428             |
| Anti-CD4 (Human) Polyclonal                                    | Purified            | -                                                                              | RehaBiotech IM:0566                         |
| Anti-ACE2 (Human) Polyclonal                                   | Purified            | -                                                                              | RehaBiotech IM:0060                         |
| Anti-ACE2 (Human) Polyclonal                                   | PE                  | -                                                                              | RehaBiotech IM:0060                         |
| Anti-sCoV-2                                                    | Purified            | -                                                                              |                                             |
| Goat Anti-IgG (Human) Polyclonal                               | Alexa 488           |                                                                                | ThermoFisher - A11013                       |
| Anti-IgG (Human)                                               |                     |                                                                                |                                             |
| Anti-IgG (mouse)                                               |                     |                                                                                |                                             |
| Anti-IgG (Rabbit)                                              | Peroxidase          |                                                                                | GE Healthcare: RPN4301                      |
| Anti-Spike                                                     | -                   | HC2001                                                                         | GeneScript: A02038                          |
