# Supplementary material for: SARS-CoV-2 Uses CD4 to Infect T Helper Lymphocytes
Source: bioRxiv or medRxiv preprint supplement (doi:10.1101/2020.09.25.20200329), 2023-01-11
Supplement: Supplementary file [file media-4.pdf]

| Cycle Threshold                   |           |          |           |
|-----------------------------------|-----------|----------|-----------|
| Figure 1 A. CD4 and CD8 infection |           |          |           |
| Mock CD4                          | CoV-2 CD4 | Mock CD8 | CoV-2 CD8 |
| 36,066                            | 29,877    | 35,426   | 33,517    |
| 37,251                            | 30,119    | 37,946   | 34,070    |
| 37,119                            | 29,449    | 36,066   | 36,416    |
| Undetermined                      | 29,326    | 35,072   | 36,027    |
| 35,670                            | 31,402    | 39,053   | 35,015    |
| 35,464                            | 31,821    | 38,385   | 35,516    |
|                                   |           |          | 36,939    |
|                                   |           |          | 35,516    |
|                                   |           |          | 33,464    |
|                                   |           |          | 33,166    |

| Cycle Threshold                    |          |          |           |           |           |
|------------------------------------|----------|----------|-----------|-----------|-----------|
| Figure 1 D. Temporal CD4 infection |          |          |           |           |           |
| Mock                               | CoV-2 2h | CoV-2 6h | CoV-2 12h | CoV-2 24h | CoV-2 48h |
| 33,245                             | 23,202   | 21,556   | 23,728    | 23,352    | 23,725    |
| 33,271                             | 23,592   | 21,683   | 23,755    | 24,293    | 23,875    |
| 33,271                             | 23,422   | 21,408   | 24,831    | 22,300    | 21,702    |
| 29,962                             | 23,619   | 21,331   | 24,555    | 22,827    | 22,423    |
| 33,920                             | 22,361   | 22,188   | 23,432    | 21,818    | 25,832    |
| 32,177                             | 22,888   | 21,953   | 22,782    | 21,238    | 25,996    |
