# Supplementary material for: SARS-CoV-2 Uses CD4 to Infect T Helper Lymphocytes
Source: bioRxiv or medRxiv preprint supplement (doi:10.1101/2020.09.25.20200329), 2023-01-11
Supplement: Supplementary file [file media-5.zip]

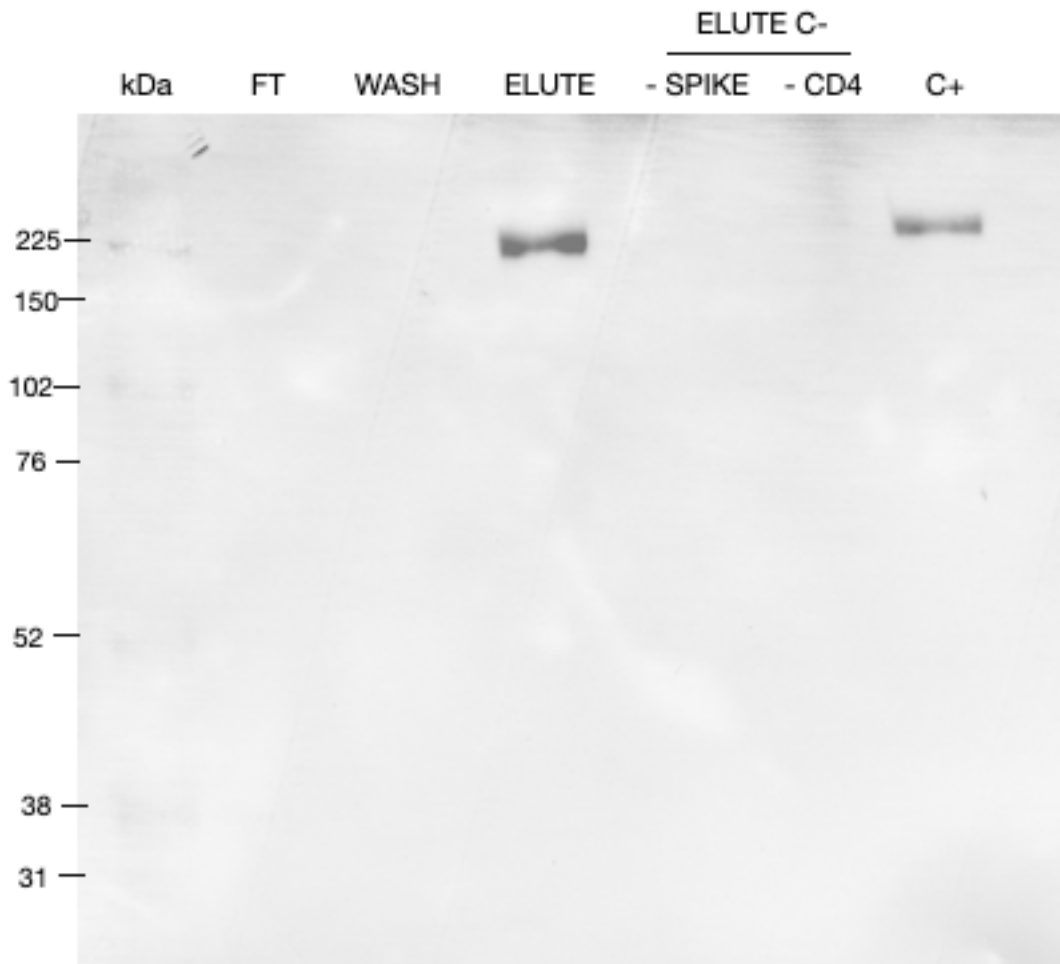

Streptavidin-HRP detection (Biolegend cat. num. 405210).
