# Supplementary material for: SARS-CoV-2 Uses CD4 to Infect T Helper Lymphocytes
Source: bioRxiv or medRxiv preprint supplement (doi:10.1101/2020.09.25.20200329), 2023-01-11
Supplement: Supplementary file [file media-5.zip]

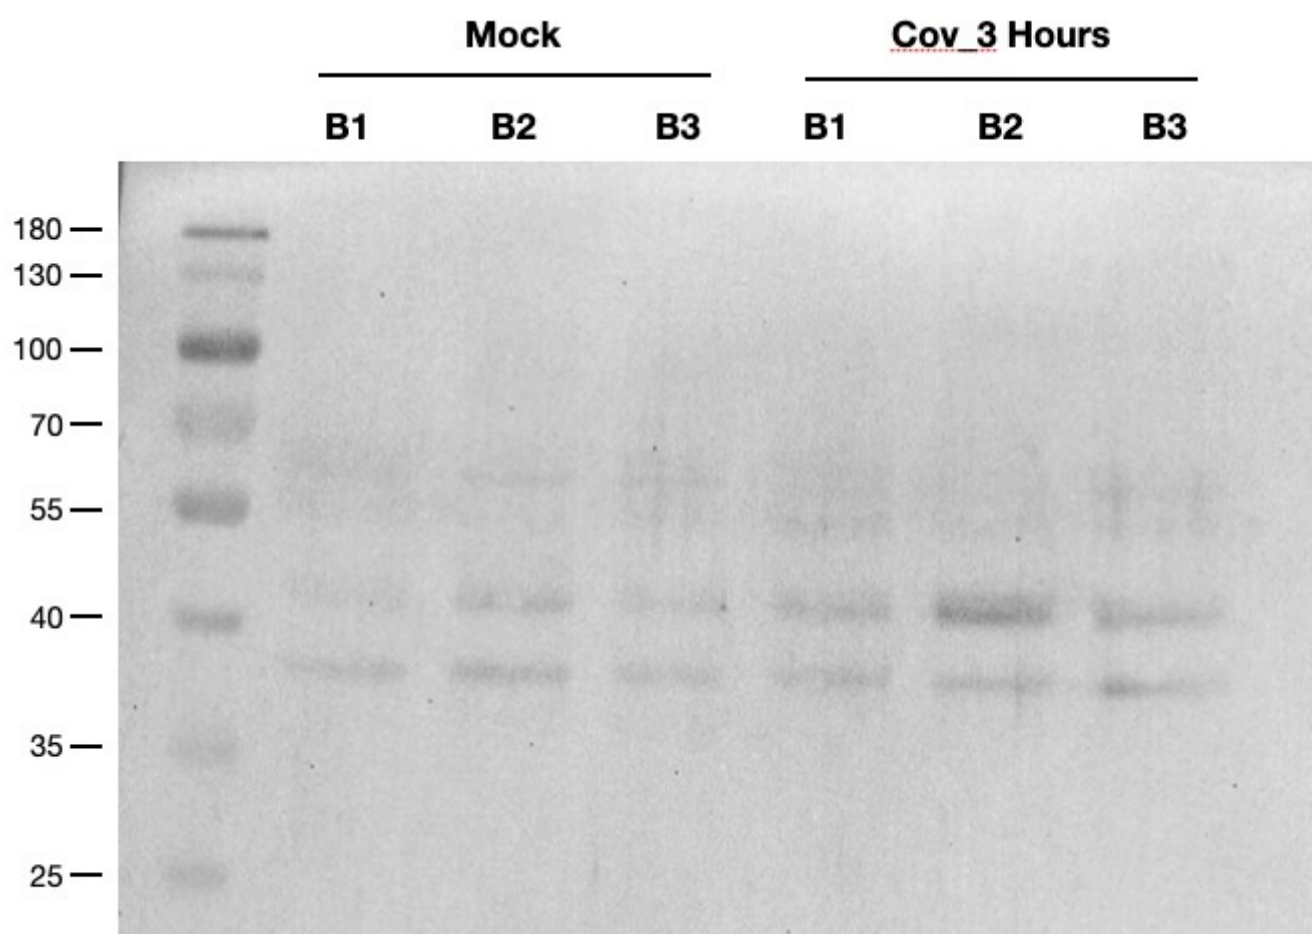

p-CREB\_Cell signaling #9198 (ser133)

**Mock** **Cov 3 Hours**

**B1 B2 B3 B1 B2 B3**

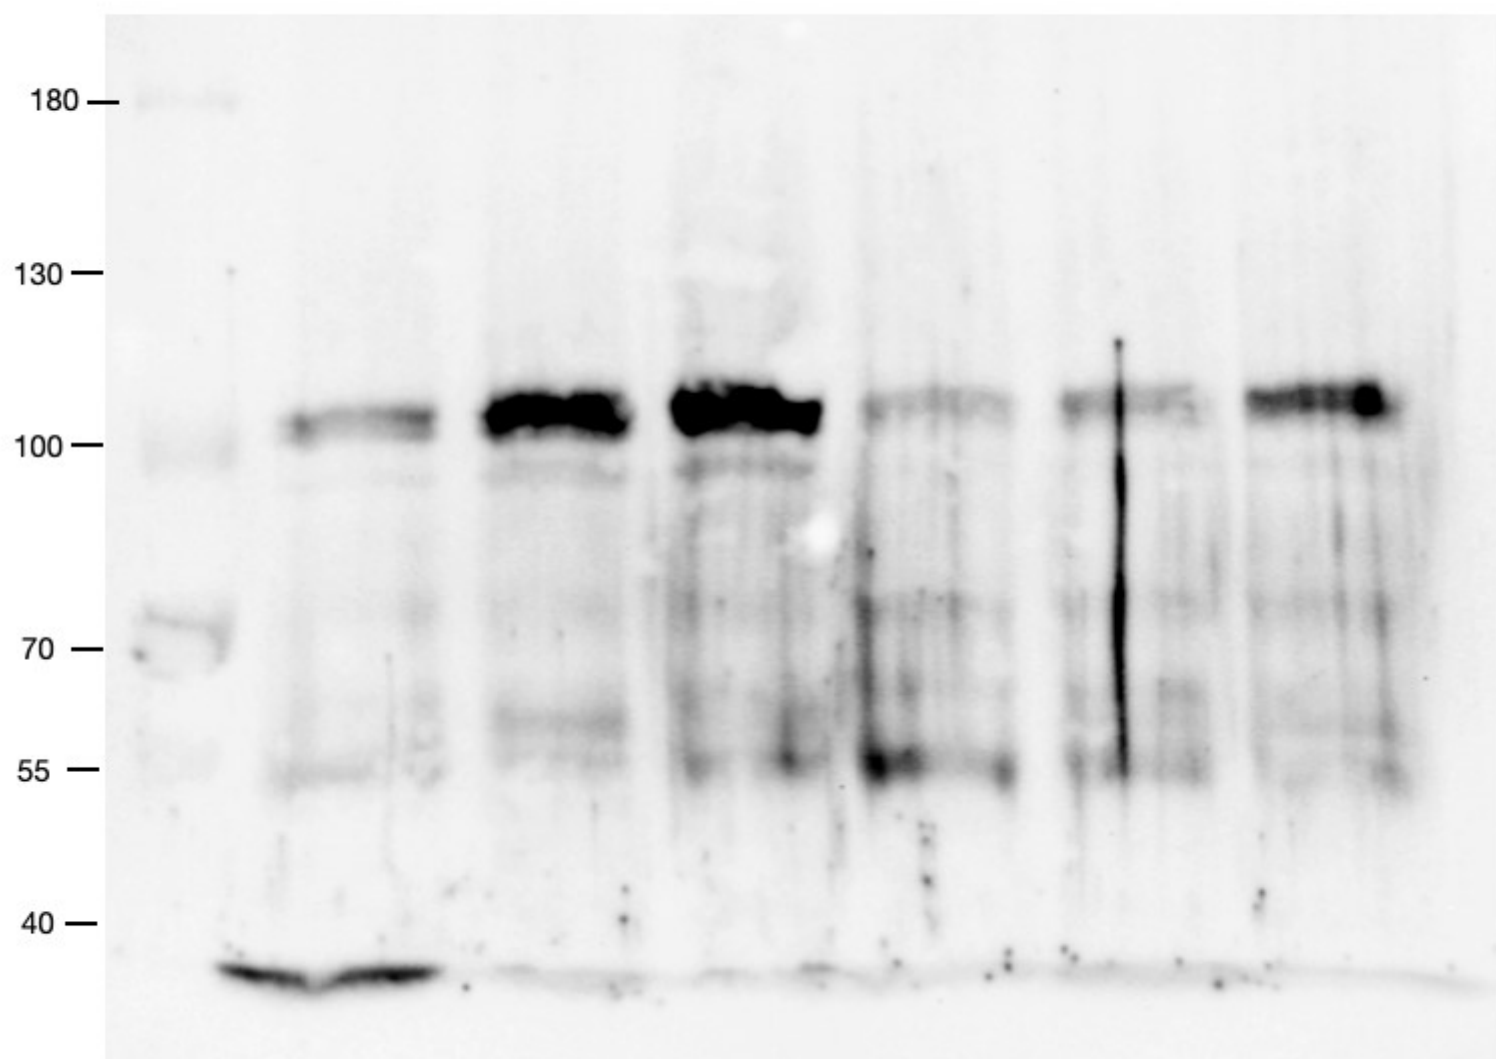

p-STAT3\_ SC-8059\_1:250

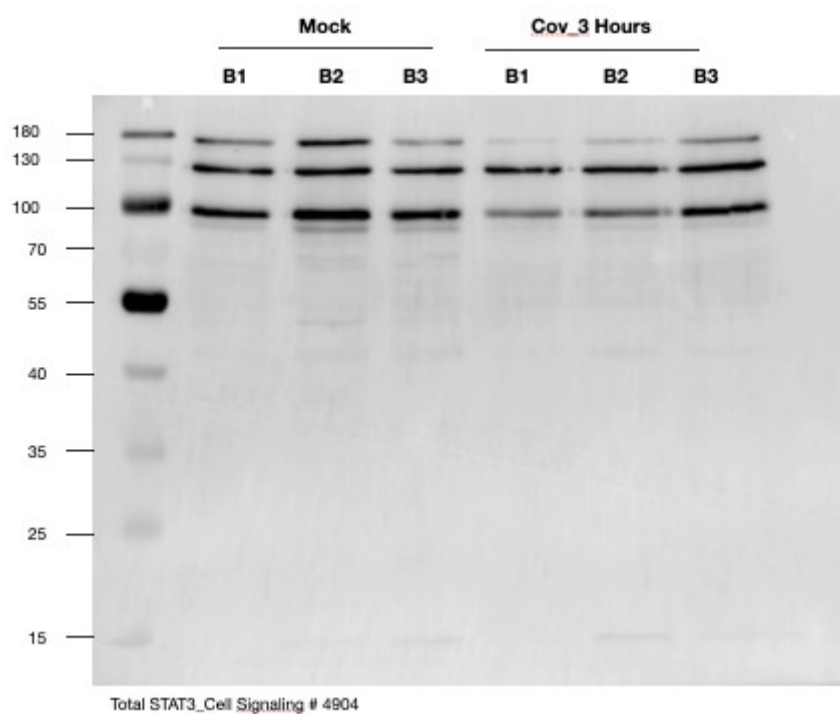

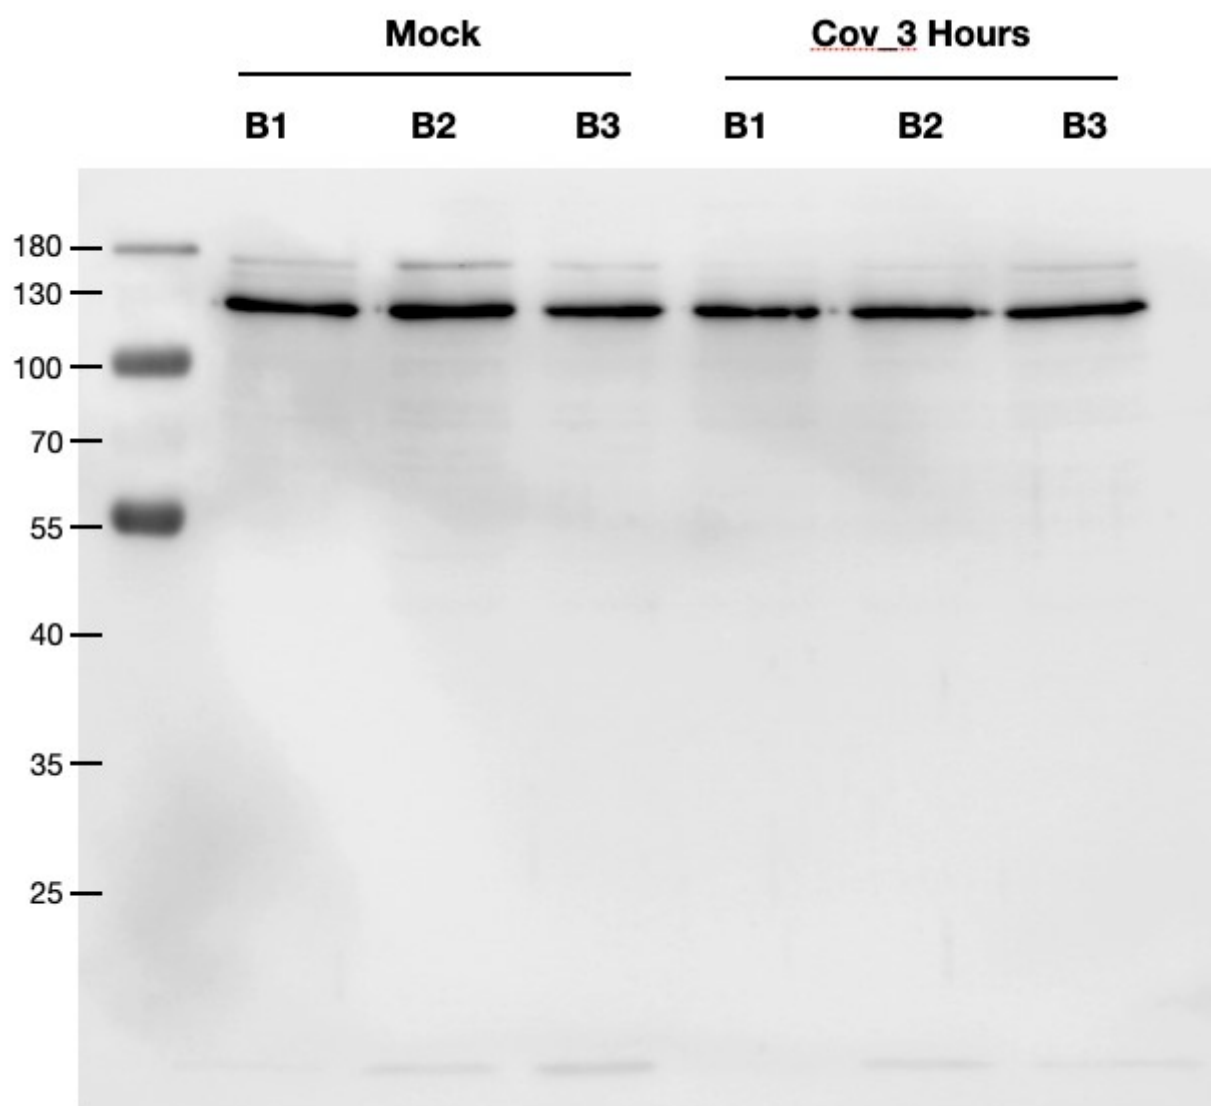

Vinculin\_Abcam #18058
